# Supplementary material for: Expression of antisense small RNAs in response to stress in Pseudomonas aeruginosa
Source: Springer Nature journal article supplement (doi:10.1186/1471-2164-15-783), 2014-09-11
Supplement: 12864_2014_6485_MOESM1_ESM.pdf [file 12864_2014_6485_MOESM1_ESM.pdf]

**Additional file 1. Information about sequencing libraries LIB<500 used for asRNA detection.**

| Condition                    | Number of biological replicates | Library Name | Total number of read pairs | Number of mapped read pairs | Number of mapped read pairs to antisense regions |
|------------------------------|---------------------------------|--------------|----------------------------|-----------------------------|--------------------------------------------------|
| Exponential growth (control) | 2                               | EXP_1        | 8990460                    | 4504801                     | 155702                                           |
|                              |                                 | EXP_2        | 9709285                    | 5147313                     | 150599                                           |
| Stationary growth            | 2                               | STA_1        | 7323352                    | 5756111                     | 318667                                           |
|                              |                                 | STA_2        | 7822811                    | 6022734                     | 343947                                           |
| Azithromycin                 | 2                               | AZI_1        | 9262216                    | 5264644                     | 94551                                            |
|                              |                                 | AZI_2        | 10046880                   | 5942905                     | 149304                                           |
| Aztreonam                    | 2                               | AZT_1        | 11022005                   | 5797896                     | 194128                                           |
|                              |                                 | AZT_2        | 9732194                    | 5995572                     | 191271                                           |
| Ceftazidime                  | 2                               | CEF_1        | 9810278                    | 4408864                     | 122171                                           |
|                              |                                 | CEF_2        | 9474852                    | 5899270                     | 153214                                           |
| Ciprofloxacin                | 2                               | CIP_1        | 10962090                   | 4725534                     | 127966                                           |
|                              |                                 | CIP_2        | 10548496                   | 5318724                     | 154348                                           |
| Colistin                     | 2                               | CO_1         | 8296145                    | 5892397                     | 56656                                            |
|                              |                                 | CO_2         | 9578219                    | 6648768                     | 60274                                            |
| Hydrogen peroxyde            | 2                               | H2O2_1       | 9045487                    | 5337832                     | 179901                                           |
|                              |                                 | H2O2_2       | 9698657                    | 5519753                     | 214202                                           |
| Meropenem                    | 2                               | MP_1         | 8992185                    | 6016045                     | 79446                                            |
|                              |                                 | MP_2         | 10749222                   | 6998403                     | 78118                                            |
| Sodium chloride              | 2                               | NaCl_1       | 8554400                    | 4769991                     | 102896                                           |
|                              |                                 | NaCl_2       | 10865953                   | 5893518                     | 99559                                            |
| Piperacillin                 | 2                               | PP_1         | 8126685                    | 5068797                     | 167740                                           |
|                              |                                 | PP_2         | 8217552                    | 5326984                     | 176163                                           |
| Tetracyclin                  | 2                               | TET_1        | 8466108                    | 5014247                     | 67706                                            |
|                              |                                 | TET_2        | 9218538                    | 5083513                     | 68507                                            |
| Tobramycin                   | 2                               | TOB_1        | 8807143                    | 4899450                     | 85418                                            |
|                              |                                 | TOB_2        | 8915533                    | 5912559                     | 98559                                            |
