# Supplementary material for: Expression of antisense small RNAs in response to stress in Pseudomonas aeruginosa
Source: Springer Nature journal article supplement (doi:10.1186/1471-2164-15-783), 2014-09-11
Supplement: 12864_2014_6485_MOESM2_ESM.pdf [file 12864_2014_6485_MOESM2_ESM.pdf]

## Additional file 2. Annotation of antisense sRNAs.

| Name       | Start*  | End*    | Length* | Type of sRNA** | Antisense gene*** | Direction | Gene name    | Gene function                                                               | Gene pathway                                                                                        |
|------------|---------|---------|---------|----------------|-------------------|-----------|--------------|-----------------------------------------------------------------------------|-----------------------------------------------------------------------------------------------------|
| asdnaA**** | 1320    | 1784    | 465     | internal       | PA0001            | >         | <i>dnaA</i>  | chromosomal replication initiator protein DnaA                              | DNA replication, recombination, modification and repair                                             |
| as4        | 35866   | 35974   | 109     | end-span       | PA0033            | <         | <i>hptC</i>  | Histidine phosphotransfer protein HptC                                      |                                                                                                     |
| as5        | 40775   | 40925   | 151     | end-span       | PA0039            | >         |              | hypothetical protein                                                        | Hypothetical, unclassified, unknown                                                                 |
| as6        | 182516  | 182617  | 102     | end-span       | PA0158            | >         | <i>trnC</i>  | Resistance-Nodulation-Cell Division (RND) tricosan efflux transporter, TrnC | Antibiotic resistance and susceptibility; Transport of small molecules                              |
| as7        | 184720  | 184861  | 142     | internal       | PA0162            | >         | <i>opdC</i>  | histidine porin OpdC                                                        | Membrane proteins; Transport of small molecules                                                     |
| as8        | 226915  | 226976  | 62      | internal       | PA0196            | >         | <i>pntB</i>  | pyridine nucleotide transhydrogenase, beta subunit                          | Transport of small molecules; Energy metabolism                                                     |
| as9        | 263722  | 263909  | 188     | internal       | PA0234            | >         |              | hypothetical protein                                                        | Hypothetical, unclassified, unknown                                                                 |
| as10       | 288493  | 288639  | 147     | internal       | PA0257            | <         |              | hypothetical protein                                                        | Related to phage, transposon, or plasmid                                                            |
| as11       | 290529  | 290665  | 137     | internal       | PA0259            | <         |              | hypothetical protein                                                        | Hypothetical, unclassified, unknown                                                                 |
| as12       | 291428  | 291543  | 116     | internal       | PA0260            | <         |              | hypothetical protein                                                        | Hypothetical, unclassified, unknown; Membrane proteins                                              |
| as13       | 299094  | 299181  | 88      | internal       | PA0264            | <         |              | hypothetical protein                                                        | Hypothetical, unclassified, unknown                                                                 |
| as14       | 334305  | 334355  | 51      | internal       | PA0296            | <         | <i>spuL</i>  | Glutamylpolyamine synthetase                                                | Putative enzymes; Carbon compound catabolism                                                        |
| as15       | 338651  | 338736  | 86      | internal       | PA0300            | <         | <i>spuD</i>  | polyamine transport protein                                                 | Transport of small molecules                                                                        |
| as16       | 353325  | 353458  | 134     | internal       | PA0313            | <         |              | L-cysteine transporter of ABC system YecS                                   | Membrane proteins; Transport of small molecules                                                     |
| as17       | 368517  | 368669  | 153     | internal       | PA0328            | <         |              | hypothetical protein                                                        | Hypothetical, unclassified, unknown                                                                 |
| as18       | 379215  | 379350  | 136     | internal       | PA0337            | >         | <i>ptsP</i>  | phosphoenolpyruvate-protein phosphotransferase PtsP                         | Transport of small molecules                                                                        |
| as19       | 448929  | 449284  | 356     | internal       | PA0407            | <         | <i>gshB</i>  | glutathione synthetase                                                      | Amino acid biosynthesis and metabolism; Biosynthesis of cofactors, prosthetic groups and carriers   |
| as20       | 521726  | 521838  | 113     | internal       | PA0461            | <         |              | conserved hypothetical protein                                              | Hypothetical, unclassified, unknown                                                                 |
| as21       | 544658  | 544778  | 121     | internal       | PA0483            | >         |              | probable acetyltransferase                                                  | Putative enzymes                                                                                    |
| as22       | 554963  | 555078  | 116     | internal       | PA0495            | >         |              | hypothetical protein                                                        | Hypothetical, unclassified, unknown                                                                 |
| as23       | 557312  | 557569  | 258     | end-span       | PA0498            | >         |              | hypothetical protein                                                        | Hypothetical, unclassified, unknown                                                                 |
| as24       | 646779  | 646892  | 114     | internal       | PA0588            | <         |              | conserved hypothetical protein                                              | Hypothetical, unclassified, unknown                                                                 |
| as25       | 654775  | 654912  | 138     | internal       | PA0595            | <         | <i>ostA</i>  | organic solvent tolerance protein OstA precursor                            | Adaptation, Protection                                                                              |
| as26       | 659114  | 659270  | 157     | internal       | PA0599            | <         |              | hypothetical protein                                                        | Hypothetical, unclassified, unknown                                                                 |
| as27       | 680736  | 680853  | 118     | internal       | PA0620            | >         |              | probable bacteriophage protein                                              | Related to phage, transposon, or plasmid                                                            |
| as28       | 697609  | 697703  | 95      | internal       | PA0641            | >         |              | probable bacteriophage protein                                              | Related to phage, transposon, or plasmid                                                            |
| as29       | 701233  | 701489  | 257     | end-span       | PA0645            | >         |              | hypothetical protein                                                        | Related to phage, transposon, or plasmid                                                            |
| as29       | 701233  | 701489  | 257     | start-span     | PA0646            | >         |              | hypothetical protein                                                        | Related to phage, transposon, or plasmid                                                            |
| as30       | 718785  | 718934  | 150     | internal       | PA0667            | <         |              | conserved hypothetical protein                                              | Hypothetical, unclassified, unknown                                                                 |
| as31       | 748895  | 749047  | 153     | internal       | PA0689            | >         |              | hypothetical protein                                                        | Hypothetical, unclassified, unknown; Transport of small molecules                                   |
| as32       | 749460  | 749562  | 103     | internal       | PA0689            | >         |              | hypothetical protein                                                        | Hypothetical, unclassified, unknown; Transport of small molecules                                   |
| as33       | 761761  | 761823  | 63      | internal       | PA0690            | >         |              | hypothetical protein                                                        | Hypothetical, unclassified, unknown                                                                 |
| as34       | 784213  | 784303  | 91      | internal       | PA0713            | >         |              | hypothetical protein                                                        | Hypothetical, unclassified, unknown                                                                 |
| as35       | 795503  | 795648  | 146     | internal       | PA0727            | >         |              | hypothetical protein from bacteriophage PF1                                 | Hypothetical, unclassified, unknown; Related to phage, transposon, or plasmid                       |
| as36       | 798624  | 798854  | 231     | start-span     | PA0730            | <         |              | probable transferase                                                        | Putative enzymes                                                                                    |
| as37       | 817964  | 818095  | 132     | start-span     | PA0750            | <         | <i>ung</i>   | uracil-DNA glycosylase                                                      | DNA replication, recombination, modification and repair                                             |
| as38       | 898637  | 898918  | 282     | end-span       | PA0823            | <         |              | lipopolysaccharide biosynthetic protein LpxO2                               | Hypothetical, unclassified, unknown                                                                 |
| as38       | 898637  | 898918  | 282     | start-span     | PA0822            | <         |              | hypothetical protein                                                        | Hypothetical, unclassified, unknown                                                                 |
| as39       | 921673  | 921840  | 168     | end-span       | PA0845            | <         |              | conserved hypothetical protein                                              | Hypothetical, unclassified, unknown                                                                 |
| as40       | 967079  | 967178  | 100     | internal       | PA0884            | >         |              | probable C4-dicarboxylate-binding periplasmic protein                       | Transport of small molecules                                                                        |
| as41       | 967184  | 967283  | 100     | internal       | PA0884            | >         |              | probable C4-dicarboxylate-binding periplasmic protein                       | Transport of small molecules                                                                        |
| as42       | 977508  | 977658  | 151     | internal       | PA0894            | <         |              | hypothetical protein                                                        | Hypothetical, unclassified, unknown                                                                 |
| as43       | 990194  | 990309  | 116     | internal       | PA0904            | <         | <i>lysC</i>  | aspartate kinase alpha and beta chain                                       | Amino acid biosynthesis and metabolism                                                              |
| as44       | 1026460 | 1026563 | 104     | internal       | PA0936            | <         | <i>lpxO2</i> | lipopolysaccharide biosynthetic protein LpxO2                               | Putative enzymes; Cell wall / LPS / capsule                                                         |
| as45       | 1027896 | 1028083 | 188     | end-span       | PA0937            | >         |              | conserved hypothetical protein                                              | Hypothetical, unclassified, unknown                                                                 |
| as47       | 1056103 | 1056248 | 146     | internal       | PA0972            | >         | <i>tolB</i>  | TolB protein                                                                | Transport of small molecules                                                                        |
| as48       | 1060351 | 1060676 | 326     | end-span       | PA0977            | <         |              | hypothetical protein                                                        | Hypothetical, unclassified, unknown                                                                 |
| as49       | 1066483 | 1066610 | 128     | internal       | PA0985            | <         | <i>pyoS5</i> | pyocin S5                                                                   | Membrane proteins; Secreted Factors (toxins, enzymes, alginate)                                     |
| as50       | 1073865 | 1074007 | 143     | end-span       | PA0992            | >         | <i>cupC1</i> | fimbrial subunit CupC1                                                      | Motility & Attachment                                                                               |
| as50       | 1073865 | 1074007 | 143     | start-span     | PA0993            | >         | <i>cupC2</i> | chaperone CupC2                                                             | Motility & Attachment; Chaperones & heat shock proteins                                             |
| as52       | 1098349 | 1098557 | 209     | internal       | PA1015            | <         |              | probable transcriptional regulator                                          | Transcriptional regulators                                                                          |
| as53       | 1119615 | 1119886 | 272     | end-span       | PA1032            | <         | <i>quiP</i>  | QuiP                                                                        | Carbon compound catabolism; Putative enzymes; Antibiotic resistance and susceptibility              |
| as54       | 1135102 | 1135286 | 185     | end-span       | PA1047            | >         |              | probable esterase                                                           | Putative enzymes                                                                                    |
| as55       | 1135776 | 1135875 | 100     | internal       | PA1048            | >         |              | probable outer membrane protein precursor                                   | Membrane proteins; Transport of small molecules                                                     |
| as56       | 1141250 | 1141364 | 115     | start-span     | PA1053            | >         |              | conserved hypothetical protein                                              | Membrane proteins                                                                                   |
| as57       | 1207482 | 1207531 | 50      | internal       | PA1113            | >         |              | probable ATP-binding/permease fusion ABC transporter                        | Membrane proteins; Transport of small molecules                                                     |
| as58       | 1232028 | 1232169 | 142     | start-span     | PA1140            | <         |              | conserved hypothetical protein                                              | Hypothetical, unclassified, unknown                                                                 |
| as59       | 1323807 | 1323918 | 112     | internal       | PA1221            | <         |              | hypothetical protein                                                        | Hypothetical, unclassified, unknown                                                                 |
| as60       | 1394817 | 1395002 | 186     | internal       | PA1284            | <         |              | probable acyl-CoA dehydrogenase                                             | Putative enzymes                                                                                    |
| as62       | 1455941 | 1456046 | 106     | internal       | PA1342            | <         |              | probable binding protein component of ABC transporter                       | Transport of small molecules                                                                        |
| as64       | 1484863 | 1485037 | 175     | internal       | PA1370            | >         |              | hypothetical protein                                                        | Hypothetical, unclassified, unknown                                                                 |
| as65       | 1485541 | 1485595 | 55      | internal       | PA1370            | >         |              | hypothetical protein                                                        | Hypothetical, unclassified, unknown                                                                 |
| as66       | 1499584 | 1499684 | 101     | internal       | PA1382            | >         |              | probable type II secretion system protein                                   | Protein secretion/export apparatus                                                                  |
| as67       | 1499690 | 1499742 | 53      | internal       | PA1382            | >         |              | probable type II secretion system protein                                   | Protein secretion/export apparatus                                                                  |
| as68       | 1502841 | 1502987 | 147     | internal       | PA1383            | >         |              | hypothetical protein                                                        | Hypothetical, unclassified, unknown                                                                 |
| as69       | 1503570 | 1503696 | 127     | internal       | PA1384            | >         | <i>galE</i>  | UDP-glucose 4-epimerase                                                     | Nucleotide biosynthesis and metabolism; Carbon compound catabolism; Central intermediary metabolism |
| as70       | 1503843 | 1503937 | 95      | internal       | PA1384            | >         | <i>galE</i>  | UDP-glucose 4-epimerase                                                     | Nucleotide biosynthesis and metabolism; Carbon compound catabolism; Central intermediary metabolism |
| as71       | 1504553 | 1504676 | 124     | end-span       | PA1384            | >         | <i>galE</i>  | UDP-glucose 4-epimerase                                                     | Nucleotide biosynthesis and metabolism; Carbon compound catabolism; Central intermediary metabolism |
| as71       | 1504553 | 1504676 | 124     | start-span     | PA1385            | >         |              | probable glycosyl transferase                                               | Cell wall / LPS / capsule                                                                           |
| as72       | 1504788 | 1504927 | 140     | internal       | PA1385            | >         |              | probable glycosyl transferase                                               | Cell wall / LPS / capsule                                                                           |
| as73       | 1506107 | 1506208 | 102     | internal       | PA1386            | >         |              | probable ATP-binding component of ABC transporter                           | Transport of small molecules                                                                        |
| as74       | 1558500 | 1558752 | 253     | internal       | PA1430            | >         | <i>lasR</i>  | transcriptional regulator LasR                                              | Adaptation, Protection; Transcriptional regulators                                                  |
| as75       | 1588434 | 1588549 | 116     | internal       | PA1458            | >         |              | probable two-component sensor                                               | Chemotaxis; Two-component regulatory systems                                                        |
| as76       | 1639661 | 1639805 | 145     | end-span       | PA1510            | <         |              | hypothetical protein                                                        | Hypothetical, unclassified, unknown                                                                 |
| as76       | 1639661 | 1639805 | 145     | start-span     | PA1509            | <         |              | hypothetical protein                                                        | Hypothetical, unclassified, unknown                                                                 |
| as77       | 1640773 | 1640948 | 176     | internal       | PA1510            | <         |              | hypothetical protein                                                        | Hypothetical, unclassified, unknown                                                                 |
| as78       | 1698424 | 1698534 | 111     | internal       | PA1561            | <         | <i>aer</i>   | aerotaxis receptor Aer                                                      | Adaptation, Protection; Chemotaxis                                                                  |
| as79       | 1717615 | 1717930 | 116     | end-span       | PA1578            | >         |              | hypothetical protein                                                        | Hypothetical, unclassified, unknown                                                                 |
| as80       | 1732127 | 1732265 | 139     | end-span       | PA1589            | >         | <i>sucD</i>  | succinyl-CoA synthetase alpha chain                                         | Energy metabolism                                                                                   |
| as81       | 1785747 | 1785881 | 135     | internal       | PA1640            | <         |              | conserved hypothetical protein                                              | Hypothetical, unclassified, unknown                                                                 |
| as82       | 1790530 | 1790650 | 121     | internal       | PA1645            | <         |              | hypothetical protein                                                        | Hypothetical, unclassified, unknown                                                                 |
| as83       | 1838134 | 1838246 | 113     | internal       | PA1688            | >         |              | hypothetical protein                                                        | Hypothetical, unclassified, unknown                                                                 |
| as84       | 1911985 | 1912118 | 134     | internal       | PA1767            | <         |              | hypothetical protein                                                        | Membrane proteins                                                                                   |
| as85       | 1912994 | 1913099 | 106     | end-span       | PA1769            | <         |              | conserved hypothetical protein                                              | Hypothetical, unclassified, unknown                                                                 |
| as86       | 1913728 | 1913919 | 192     | start-span     | PA1769            | <         |              | conserved hypothetical protein                                              | Hypothetical, unclassified, unknown                                                                 |
| as87       | 1916046 | 1916172 | 127     | internal       | PA1770            | >         | <i>ppsA</i>  | phosphoenolpyruvate synthase                                                | Energy metabolism; Carbon compound catabolism; Central intermediary metabolism                      |
| as88       | 1949036 | 1949142 | 107     | internal       | PA1797            | <         |              | hypothetical protein                                                        | Hypothetical, unclassified, unknown                                                                 |
| as89       | 1953270 | 1953371 | 102     | internal       | PA1800            | >         | <i>tig</i>   | trigger factor                                                              | Cell division; Chaperones & heat shock proteins                                                     |
| as90       | 1954335 | 1954415 | 81      | internal       | PA1801            | >         | <i>clpP</i>  | ClpP                                                                        | Chaperones & heat shock proteins; Cell wall / LPS / capsule                                         |



|            |         |         |     |            |        |   |              |                                                          |                                                                                                   |
|------------|---------|---------|-----|------------|--------|---|--------------|----------------------------------------------------------|---------------------------------------------------------------------------------------------------|
| as196      | 5071970 | 5072154 | 185 | internal   | PA4527 | > | <i>pilC</i>  | still frameshift type 4 fimbrial biogenesis protein PilC | Motility & Attachment                                                                             |
| as197      | 5101107 | 5101200 | 94  | internal   | PA4554 | > | <i>pilY1</i> | type 4 fimbrial biogenesis protein PilY1                 | Motility & Attachment                                                                             |
| as198      | 5101511 | 5101611 | 101 | internal   | PA4554 | > | <i>pilY1</i> | type 4 fimbrial biogenesis protein PilY1                 | Motility & Attachment                                                                             |
| as199      | 5141781 | 5141969 | 189 | end-span   | PA4591 | < |              | probable hypothetical protein                            | Hypothetical, unclassified, unknown                                                               |
| as200      | 5148538 | 5148668 | 131 | start-span | PA4595 | < |              | probable ATP-binding component of ABC transporter        | Transport of small molecules                                                                      |
| as201      | 5274032 | 5274193 | 162 | internal   | PA4696 | < | <i>ilvI</i>  | acetolactate synthase large subunit                      | Biosynthesis of cofactors, prosthetic groups and carriers; Amino acid biosynthesis and metabolism |
| as202      | 5296232 | 5296293 | 62  | internal   | PA4717 | > |              | conserved hypothetical protein                           | Hypothetical, unclassified, unknown                                                               |
| as203      | 5296311 | 5296538 | 228 | internal   | PA4717 | > |              | conserved hypothetical protein                           | Hypothetical, unclassified, unknown                                                               |
| as204      | 5301771 | 5301838 | 68  | internal   | PA4722 | < |              | probable aminotransferase                                | Putative enzymes                                                                                  |
| as205      | 5356355 | 5356495 | 141 | internal   | PA4770 | > | <i>lldP</i>  | L-lactate permease                                       | Transport of small molecules                                                                      |
| as206      | 5375454 | 5375529 | 76  | end-span   | PA4786 | > |              | probable short-chain dehydrogenase                       | Putative enzymes                                                                                  |
| as207      | 5380813 | 5380919 | 107 | internal   | PA4793 | > |              | hypothetical protein                                     | Hypothetical, unclassified, unknown                                                               |
| as208      | 5382370 | 5382497 | 128 | end-span   | PA4796 | > |              | hypothetical protein                                     | Hypothetical, unclassified, unknown                                                               |
| as209      | 5408036 | 5408137 | 102 | internal   | PA4818 | < |              | conserved hypothetical protein                           | Membrane proteins                                                                                 |
| as210      | 5473394 | 5473504 | 111 | internal   | PA4877 | < |              | hypothetical protein                                     | Hypothetical, unclassified, unknown                                                               |
| as211      | 5522339 | 5522410 | 72  | start-span | PA4923 | < |              | conserved hypothetical protein                           | Hypothetical, unclassified, unknown                                                               |
| as212      | 5532791 | 5532916 | 126 | internal   | PA4929 | < |              | hypothetical protein                                     | Membrane proteins                                                                                 |
| as214      | 5545002 | 5545131 | 130 | internal   | PA4941 | < | <i>hflC</i>  | protease subunit HflC                                    | Translation, post-translational modification, degradation; Cell division                          |
| as216      | 5580862 | 5581109 | 248 | start-span | PA4972 | > |              | hypothetical protein                                     | Hypothetical, unclassified, unknown                                                               |
| as217      | 5584935 | 5585163 | 229 | internal   | PA4974 | > |              | probable outer membrane protein precursor                | Protein secretion/export apparatus                                                                |
| as218      | 5585580 | 5585652 | 73  | end-span   | PA4975 | < |              | NAD(P)H quinone oxidoreductase                           | Energy metabolism                                                                                 |
| as219      | 5602759 | 5602870 | 112 | internal   | PA4986 | < |              | probable oxidoreductase                                  | Putative enzymes                                                                                  |
| as220      | 5617657 | 5617793 | 137 | internal   | PA5000 | < | <i>wapR</i>  | alpha-1,3-rhamnosyltransferase WapR                      | Putative enzymes; Cell wall / LPS / capsule                                                       |
| as221      | 5618584 | 5618634 | 51  | internal   | PA5001 | < |              | hypothetical protein                                     | Hypothetical, unclassified, unknown                                                               |
| as222      | 5655041 | 5655112 | 72  | internal   | PA5024 | < |              | conserved hypothetical protein                           | Hypothetical, unclassified, unknown                                                               |
| as223      | 5678557 | 5678652 | 96  | internal   | PA5042 | < | <i>pilO</i>  | type 4 fimbrial biogenesis protein PilO                  | Motility & Attachment                                                                             |
| asponA**** | 5680819 | 5681167 | 349 | start-span | PA5045 | < | <i>ponA</i>  | penicillin-binding protein 1A                            | Cell wall / LPS / capsule                                                                         |
| as225      | 5684803 | 5684910 | 108 | end-span   | PA5047 | < |              | hypothetical protein                                     | Hypothetical, unclassified, unknown                                                               |
| as226      | 5699012 | 5699062 | 51  | internal   | PA5058 | < | <i>phaC2</i> | poly(3-hydroxyalkanoic acid) synthase 2                  | Central intermediary metabolism                                                                   |
| as228      | 5725557 | 5725795 | 239 | internal   | PA5087 | < |              | hypothetical protein                                     | Hypothetical, unclassified, unknown                                                               |
| as229      | 5739066 | 5739203 | 138 | internal   | PA5097 | < |              | probable amino acid permease                             | Membrane proteins; Transport of small molecules                                                   |
| as230      | 5785777 | 5785905 | 129 | internal   | PA5136 | < |              | hypothetical protein                                     | Hypothetical, unclassified, unknown                                                               |
| as231      | 5799079 | 5799208 | 130 | internal   | PA5150 | < |              | probable short-chain dehydrogenase                       | Putative enzymes                                                                                  |
| as232      | 5817430 | 5817493 | 64  | internal   | PA5167 | > |              | probable c4-dicarboxylate-binding protein                | Membrane proteins; Transport of small molecules                                                   |
| as233      | 5824524 | 5824599 | 76  | internal   | PA5172 | > | <i>arcB</i>  | ornithine carbamoyltransferase, catabolic                | Amino acid biosynthesis and metabolism                                                            |
| as234      | 5844451 | 5844527 | 77  | end-span   | PA5192 | < | <i>pckA</i>  | phosphoenolpyruvate carboxykinase                        | Carbon compound catabolism; Energy metabolism                                                     |
| as235      | 5863452 | 5863719 | 268 | start-span | PA5208 | < |              | conserved hypothetical protein                           | Hypothetical, unclassified, unknown                                                               |
| as236      | 5868209 | 5868408 | 200 | internal   | PA5213 | < | <i>gcvP1</i> | glycine cleavage system protein P1                       | Central intermediary metabolism; Amino acid biosynthesis and metabolism                           |
| as237      | 5896925 | 5897003 | 79  | internal   | PA5238 | < |              | probable O-antigen acetylase                             | Putative enzymes; Membrane proteins; Cell wall / LPS / capsule                                    |
| as238      | 5897008 | 5897057 | 50  | internal   | PA5238 | < |              | probable O-antigen acetylase                             | Putative enzymes; Membrane proteins; Cell wall / LPS / capsule                                    |
| as239      | 5926819 | 5926963 | 145 | internal   | PA5264 | < |              | hypothetical protein                                     | Hypothetical, unclassified, unknown; Membrane proteins                                            |
| as240      | 6059529 | 6059600 | 72  | internal   | PA5380 | > | <i>gbdR</i>  | GbdR                                                     | Transcriptional regulators                                                                        |
| as241      | 6090655 | 6090800 | 146 | start-span | PA5412 | < |              | hypothetical protein                                     | Hypothetical, unclassified, unknown                                                               |
| as242      | 6135711 | 6135789 | 79  | internal   | PA5446 | > |              | hypothetical protein                                     | Hypothetical, unclassified, unknown                                                               |
| as243      | 6141133 | 6141239 | 107 | internal   | PA5451 | < | <i>wzm</i>   | membrane subunit of A-band LPS efflux transporter        | Cell wall / LPS / capsule; Membrane proteins; Transport of small molecules                        |
| as244      | 6157855 | 6157964 | 110 | internal   | PA5468 | > |              | probable citrate transporter                             | Transport of small molecules                                                                      |
| as245      | 6158032 | 6158203 | 172 | end-span   | PA5468 | > |              | probable citrate transporter                             | Transport of small molecules                                                                      |
| as245      | 6158032 | 6158203 | 172 | start-span | PA5469 | > |              | conserved hypothetical protein                           | Membrane proteins                                                                                 |
| as246      | 6171684 | 6171915 | 232 | start-span | PA5480 | > |              | hypothetical protein                                     | Hypothetical, unclassified, unknown                                                               |
| as247      | 6183216 | 6183389 | 174 | internal   | PA5492 | > |              | conserved hypothetical protein                           | Hypothetical, unclassified, unknown                                                               |
| as248      | 6218749 | 6219078 | 330 | end-span   | PA5525 | > |              | probable transcriptional regulator                       | Transcriptional regulators                                                                        |
| as249      | 6245830 | 6245973 | 144 | internal   | PA5551 | < |              | hypothetical protein                                     | Hypothetical, unclassified, unknown                                                               |
| as250      | 6247796 | 6247909 | 114 | end-span   | PA5553 | < | <i>atpC</i>  | ATP synthase epsilon chain                               | Energy metabolism                                                                                 |

\* Coordinates and length of the sRNAs predicted by RNA-Seq data.

\*\*The antisense sRNAs were categorized depending on their position with respect to the opposite gene as "start-span" (the asRNA spans over the start of the antisense gene), "internal" (the asRNA start and end within the antisense gene), or "end-span" (the asRNA spans over the end of the gene).

\*\*\*Some asRNAs overlap with 2 genes.

\*\*\*\*Coordinates validated by 5' and 3'-RACE experiments.
