# Supplementary material for: Expression of antisense small RNAs in response to stress in Pseudomonas aeruginosa
Source: Springer Nature journal article supplement (doi:10.1186/1471-2164-15-783), 2014-09-11

**Additional file 3. Antisense transcription in the *wbp* operon.** Genes are depicted in blue and asRNAs in green.

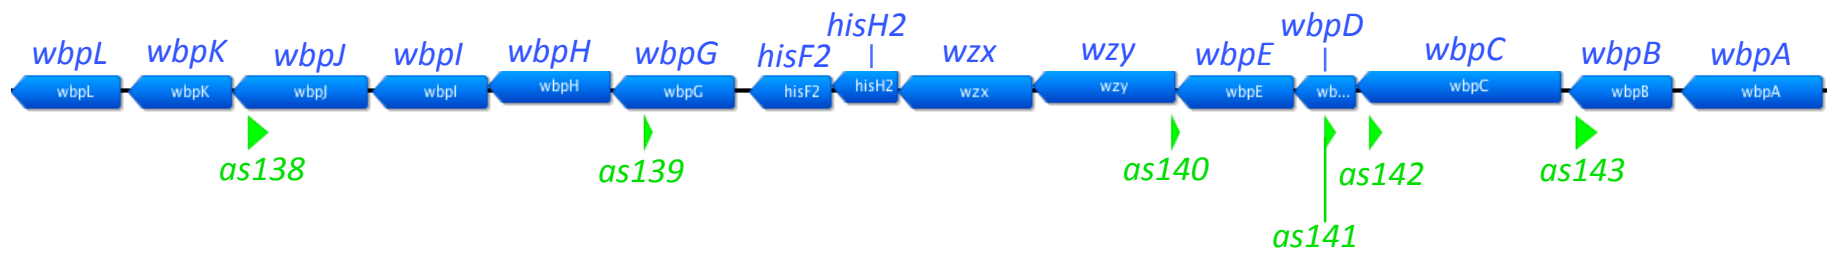

Supplement: 12864_2014_6485_MOESM3_ESM.pdf [file 12864_2014_6485_MOESM3_ESM.pdf]
