# Supplementary material for: Expression of antisense small RNAs in response to stress in Pseudomonas aeruginosa
Source: Springer Nature journal article supplement (doi:10.1186/1471-2164-15-783), 2014-09-11
Supplement: 12864_2014_6485_MOESM4_ESM.pdf [file 12864_2014_6485_MOESM4_ESM.pdf]

## Additional file 4. Antisense sRNAs differentially expressed.

| Name                                                                 | Start*  | End*    | Length* | Direction asRNA | Fold change** |
|----------------------------------------------------------------------|---------|---------|---------|-----------------|---------------|
| <b>asRNAs differentially expressed during AZI (10xMIC) treatment</b> |         |         |         |                 |               |
| as165                                                                | 4242856 | 4242966 | 111     | <               | 0.12          |
| as210                                                                | 5473394 | 5473504 | 111     | >               | 0.21          |
| as94                                                                 | 2027457 | 2027571 | 115     | <               | 0.26          |
| as230                                                                | 5785777 | 5785905 | 129     | <               | 0.32          |
| as77                                                                 | 1640773 | 1640948 | 176     | >               | 0.38          |
| as100                                                                | 2128729 | 2128826 | 98      | <               | 0.39          |
| as42                                                                 | 977508  | 977658  | 151     | >               | 0.42          |
| as183                                                                | 4781848 | 4781947 | 100     | <               | 2.55          |
| as99                                                                 | 2121071 | 2121240 | 170     | >               | 2.69          |
| as123                                                                | 3015850 | 3015969 | 120     | <               | 2.90          |
| as231                                                                | 5799079 | 5799208 | 130     | >               | 2.94          |
| as115                                                                | 2902292 | 2902391 | 100     | <               | 3.30          |
| as111                                                                | 2756364 | 2756944 | 581     | <               | 3.34          |
| as117                                                                | 2946138 | 2946205 | 68      | <               | 4.87          |
| as244                                                                | 6157855 | 6157964 | 110     | <               | 11.33         |
| as184                                                                | 4842427 | 4842583 | 157     | <               | 27.49         |
| <b>asRNAs differentially expressed during AZT (3xMIC) treatment</b>  |         |         |         |                 |               |
| as6                                                                  | 182516  | 182617  | 102     | <               | 0.09          |
| as48                                                                 | 1060351 | 1060676 | 326     | >               | 0.26          |
| as104                                                                | 2445134 | 2445251 | 118     | >               | 0.32          |
| as19                                                                 | 448929  | 449284  | 356     | >               | 0.33          |
| as119                                                                | 2959629 | 2959767 | 139     | <               | 0.36          |
| as78                                                                 | 1698424 | 1698534 | 111     | >               | 0.41          |
| as120                                                                | 2982707 | 2982848 | 142     | <               | 2.06          |
| as29                                                                 | 701233  | 701489  | 257     | <               | 2.07          |
| as163                                                                | 4166790 | 4167046 | 257     | <               | 2.20          |
| as10                                                                 | 288493  | 288639  | 147     | >               | 2.30          |
| as200                                                                | 5148538 | 5148668 | 131     | >               | 2.33          |
| as228                                                                | 5725557 | 5725795 | 239     | >               | 2.34          |
| as195                                                                | 5071575 | 5071963 | 389     | <               | 2.51          |
| asdnaA****                                                           | 1320    | 1784    | 465     | <               | 2.79          |
| as146                                                                | 3612043 | 3612282 | 240     | >               | 2.82          |
| asponA****                                                           | 5680819 | 5681167 | 349     | <               | 2.94          |
| as205                                                                | 5356355 | 5356495 | 141     | <               | 3.13          |
| as162                                                                | 4156819 | 4156946 | 128     | <               | 3.24          |
| as45                                                                 | 1027896 | 1028083 | 188     | <               | 3.56          |
| as135                                                                | 3414435 | 3414491 | 57      | <               | 4.21          |
| as181                                                                | 4773392 | 4773503 | 112     | >               | 5.50          |
| as221                                                                | 5618584 | 5618634 | 51      | >               | 6.08          |
| as244                                                                | 6157855 | 6157964 | 110     | <               | 6.37          |
| as32                                                                 | 749460  | 749562  | 103     | <               | 6.84          |
| as39                                                                 | 921673  | 921840  | 168     | >               | 20.82         |
| as152                                                                | 3866017 | 3866206 | 190     | <               | 21.77         |
| as128                                                                | 3119347 | 3119453 | 107     | >               | 22.06         |
| <b>asRNAs differentially expressed during CEF (3xMIC) treatment</b>  |         |         |         |                 |               |
| as6                                                                  | 182516  | 182617  | 102     | <               | 0.08          |
| as75                                                                 | 1588434 | 1588549 | 116     | <               | 0.09          |
| as210                                                                | 5473394 | 5473504 | 111     | >               | 0.12          |
| as48                                                                 | 1060351 | 1060676 | 326     | >               | 0.14          |
| as83                                                                 | 1838134 | 1838246 | 113     | <               | 0.16          |

|       |         |         |     |   |       |
|-------|---------|---------|-----|---|-------|
| as119 | 2959629 | 2959767 | 139 | < | 0.17  |
| as19  | 448929  | 449284  | 356 | > | 0.20  |
| as43  | 990194  | 990309  | 116 | < | 0.35  |
| as138 | 3530607 | 3530794 | 188 | > | 0.37  |
| as94  | 2027457 | 2027571 | 115 | < | 0.39  |
| as235 | 5863452 | 5863719 | 268 | > | 0.43  |
| as146 | 3612043 | 3612282 | 240 | > | 2.10  |
| as29  | 701233  | 701489  | 257 | < | 2.17  |
| as24  | 646779  | 646892  | 114 | > | 2.21  |
| as200 | 5148538 | 5148668 | 131 | > | 2.22  |
| as45  | 1027896 | 1028083 | 188 | < | 2.32  |
| as192 | 5049739 | 5049879 | 141 | < | 2.45  |
| as4   | 35866   | 35974   | 109 | > | 4.02  |
| as16  | 353325  | 353458  | 134 | > | 4.93  |
| as145 | 3593054 | 3593188 | 135 | < | 7.72  |
| as129 | 3120806 | 3120915 | 110 | < | 12.58 |
| as39  | 921673  | 921840  | 168 | > | 24.03 |
| as56  | 1141250 | 1141364 | 115 | < | 32.30 |

**asRNAs differentially expressed during CIP (3xMIC) treatment**

---

|            |         |         |     |   |      |
|------------|---------|---------|-----|---|------|
| as6        | 182516  | 182617  | 102 | < | 0.02 |
| as92       | 2012282 | 2012454 | 173 | > | 0.05 |
| as64       | 1484863 | 1485037 | 175 | < | 0.07 |
| as169      | 4329401 | 4329645 | 245 | > | 0.07 |
| as104      | 2445134 | 2445251 | 118 | > | 0.10 |
| as157      | 4048252 | 4048377 | 126 | > | 0.11 |
| as183      | 4781848 | 4781947 | 100 | < | 0.11 |
| as131      | 3173549 | 3173835 | 287 | < | 0.13 |
| as110      | 2756154 | 2756267 | 114 | < | 0.15 |
| as23       | 557312  | 557569  | 258 | > | 0.17 |
| as111      | 2756364 | 2756944 | 581 | < | 0.19 |
| as231      | 5799079 | 5799208 | 130 | > | 0.20 |
| as29       | 701233  | 701489  | 257 | < | 0.20 |
| as21       | 544658  | 544778  | 121 | < | 0.21 |
| as77       | 1640773 | 1640948 | 176 | > | 0.23 |
| as19       | 448929  | 449284  | 356 | > | 0.23 |
| as225      | 5684803 | 5684910 | 108 | > | 0.24 |
| as165      | 4242856 | 4242966 | 111 | < | 0.24 |
| as31       | 748895  | 749047  | 153 | < | 0.27 |
| as12       | 291428  | 291543  | 116 | > | 0.31 |
| as101      | 2314771 | 2314932 | 162 | < | 0.34 |
| as48       | 1060351 | 1060676 | 326 | > | 0.34 |
| as55       | 1135776 | 1135875 | 100 | < | 0.36 |
| as38       | 898637  | 898918  | 282 | > | 0.37 |
| as43       | 990194  | 990309  | 116 | < | 0.38 |
| as94       | 2027457 | 2027571 | 115 | < | 0.40 |
| as98       | 2120607 | 2120921 | 315 | > | 0.43 |
| as138      | 3530607 | 3530794 | 188 | > | 0.47 |
| as235      | 5863452 | 5863719 | 268 | > | 0.49 |
| as9        | 263722  | 263909  | 188 | < | 0.49 |
| as100      | 2128729 | 2128826 | 98  | < | 2.05 |
| asponA**** | 5680819 | 5681167 | 349 | < | 2.06 |
| as179      | 4763739 | 4763790 | 52  | > | 2.22 |
| as208      | 5382370 | 5382497 | 128 | < | 2.48 |
| as52       | 1098349 | 1098557 | 209 | > | 2.80 |
| as26       | 659114  | 659270  | 157 | > | 2.84 |
| as160      | 4092478 | 4092590 | 113 | > | 2.97 |

|            |         |         |     |   |       |
|------------|---------|---------|-----|---|-------|
| as163      | 4166790 | 4167046 | 257 | < | 3.05  |
| as7        | 184720  | 184861  | 142 | < | 3.26  |
| as24       | 646779  | 646892  | 114 | > | 3.35  |
| as45       | 1027896 | 1028083 | 188 | < | 3.54  |
| as181      | 4773392 | 4773503 | 112 | > | 3.69  |
| as32       | 749460  | 749562  | 103 | < | 3.77  |
| as115      | 2902292 | 2902391 | 100 | < | 4.45  |
| asdnaA**** | 1320    | 1784    | 465 | < | 4.67  |
| as136      | 3508613 | 3508673 | 61  | < | 6.06  |
| as4        | 35866   | 35974   | 109 | > | 6.41  |
| as152      | 3866017 | 3866206 | 190 | < | 6.96  |
| as16       | 353325  | 353458  | 134 | > | 12.17 |
| as128      | 3119347 | 3119453 | 107 | > | 16.61 |
| as122      | 3013744 | 3013890 | 147 | > | 22.25 |
| as129      | 3120806 | 3120915 | 110 | < | 24.88 |

**asRNAs differentially expressed during CO (3xMIC) treatment**

---

|            |         |         |     |   |      |
|------------|---------|---------|-----|---|------|
| as6        | 182516  | 182617  | 102 | < | 0.02 |
| as37       | 817964  | 818095  | 132 | < | 0.10 |
| as19       | 448929  | 449284  | 356 | > | 0.11 |
| as230      | 5785777 | 5785905 | 129 | < | 0.12 |
| as201      | 5274032 | 5274193 | 162 | > | 0.14 |
| as131      | 3173549 | 3173835 | 287 | < | 0.14 |
| as64       | 1484863 | 1485037 | 175 | < | 0.18 |
| as104      | 2445134 | 2445251 | 118 | > | 0.18 |
| as235      | 5863452 | 5863719 | 268 | > | 0.19 |
| as48       | 1060351 | 1060676 | 326 | > | 0.20 |
| as83       | 1838134 | 1838246 | 113 | < | 0.20 |
| as92       | 2012282 | 2012454 | 173 | > | 0.20 |
| as12       | 291428  | 291543  | 116 | > | 0.21 |
| as206      | 5375454 | 5375529 | 76  | < | 0.30 |
| as9        | 263722  | 263909  | 188 | < | 0.30 |
| as203      | 5296311 | 5296538 | 228 | < | 0.32 |
| as42       | 977508  | 977658  | 151 | > | 0.32 |
| asponA**** | 5680819 | 5681167 | 349 | < | 0.32 |
| as225      | 5684803 | 5684910 | 108 | > | 0.33 |
| as11       | 290529  | 290665  | 137 | > | 0.34 |
| as55       | 1135776 | 1135875 | 100 | < | 0.34 |
| as44       | 1026460 | 1026563 | 104 | > | 0.36 |
| as169      | 4329401 | 4329645 | 245 | > | 0.39 |
| as82       | 1790530 | 1790650 | 121 | > | 0.42 |
| as81       | 1785747 | 1785881 | 135 | > | 0.45 |
| as146      | 3612043 | 3612282 | 240 | > | 2.25 |
| as119      | 2959629 | 2959767 | 139 | < | 2.30 |
| as192      | 5049739 | 5049879 | 141 | < | 2.37 |
| as90       | 1954335 | 1954415 | 81  | < | 2.72 |
| as120      | 2982707 | 2982848 | 142 | < | 2.95 |
| as78       | 1698424 | 1698534 | 111 | > | 3.04 |
| as16       | 353325  | 353458  | 134 | > | 3.41 |
| as221      | 5618584 | 5618634 | 51  | > | 3.87 |
| as247      | 6183216 | 6183389 | 174 | < | 4.48 |
| as205      | 5356355 | 5356495 | 141 | < | 4.96 |
| as162      | 4156819 | 4156946 | 128 | < | 5.35 |
| as57       | 1207482 | 1207531 | 50  | < | 5.44 |
| as121      | 3005381 | 3005497 | 117 | < | 6.22 |
| as25       | 654775  | 654912  | 138 | > | 6.25 |
| as36       | 798624  | 798854  | 231 | > | 6.86 |

|                                                                      |         |         |     |   |       |
|----------------------------------------------------------------------|---------|---------|-----|---|-------|
| as20                                                                 | 521726  | 521838  | 113 | > | 36.01 |
| <b>asRNAs differentially expressed during H2O2 (1 mM) treatment</b>  |         |         |     |   |       |
| as6                                                                  | 182516  | 182617  | 102 | < | 0.06  |
| as48                                                                 | 1060351 | 1060676 | 326 | > | 0.35  |
| as104                                                                | 2445134 | 2445251 | 118 | > | 0.45  |
| as19                                                                 | 448929  | 449284  | 356 | > | 0.45  |
| as84                                                                 | 1911985 | 1912118 | 134 | > | 2.05  |
| asdnaA****                                                           | 1320    | 1784    | 465 | < | 2.11  |
| as29                                                                 | 701233  | 701489  | 257 | < | 2.28  |
| as146                                                                | 3612043 | 3612282 | 240 | > | 2.96  |
| as174                                                                | 4666087 | 4666202 | 116 | < | 3.31  |
| as205                                                                | 5356355 | 5356495 | 141 | < | 3.89  |
| as143                                                                | 3542803 | 3542997 | 195 | > | 4.70  |
| as244                                                                | 6157855 | 6157964 | 110 | < | 5.40  |
| as120                                                                | 2982707 | 2982848 | 142 | < | 5.79  |
| as221                                                                | 5618584 | 5618634 | 51  | > | 6.24  |
| as145                                                                | 3593054 | 3593188 | 135 | < | 6.51  |
| as20                                                                 | 521726  | 521838  | 113 | > | 7.47  |
| as39                                                                 | 921673  | 921840  | 168 | > | 9.95  |
| <b>asRNAs differentially expressed during MP (3xMIC) treatment</b>   |         |         |     |   |       |
| as6                                                                  | 182516  | 182617  | 102 | < | 0.05  |
| as19                                                                 | 448929  | 449284  | 356 | > | 0.09  |
| as201                                                                | 5274032 | 5274193 | 162 | > | 0.09  |
| as77                                                                 | 1640773 | 1640948 | 176 | > | 0.09  |
| as104                                                                | 2445134 | 2445251 | 118 | > | 0.10  |
| as235                                                                | 5863452 | 5863719 | 268 | > | 0.14  |
| as12                                                                 | 291428  | 291543  | 116 | > | 0.15  |
| as131                                                                | 3173549 | 3173835 | 287 | < | 0.16  |
| as48                                                                 | 1060351 | 1060676 | 326 | > | 0.16  |
| as55                                                                 | 1135776 | 1135875 | 100 | < | 0.19  |
| as230                                                                | 5785777 | 5785905 | 129 | < | 0.22  |
| as138                                                                | 3530607 | 3530794 | 188 | > | 0.26  |
| as169                                                                | 4329401 | 4329645 | 245 | > | 0.27  |
| as225                                                                | 5684803 | 5684910 | 108 | > | 0.31  |
| as220                                                                | 5617657 | 5617793 | 137 | > | 0.33  |
| as203                                                                | 5296311 | 5296538 | 228 | < | 0.41  |
| as31                                                                 | 748895  | 749047  | 153 | < | 0.44  |
| as94                                                                 | 2027457 | 2027571 | 115 | < | 0.45  |
| as23                                                                 | 557312  | 557569  | 258 | > | 0.45  |
| asponA****                                                           | 5680819 | 5681167 | 349 | < | 0.48  |
| as81                                                                 | 1785747 | 1785881 | 135 | > | 2.20  |
| as146                                                                | 3612043 | 3612282 | 240 | > | 2.62  |
| as200                                                                | 5148538 | 5148668 | 131 | > | 2.82  |
| as16                                                                 | 353325  | 353458  | 134 | > | 3.57  |
| as163                                                                | 4166790 | 4167046 | 257 | < | 3.92  |
| as248                                                                | 6218749 | 6219078 | 330 | < | 4.08  |
| as29                                                                 | 701233  | 701489  | 257 | < | 4.51  |
| as162                                                                | 4156819 | 4156946 | 128 | < | 5.46  |
| as62                                                                 | 1455941 | 1456046 | 106 | > | 15.67 |
| as236                                                                | 5868209 | 5868408 | 200 | > | 21.07 |
| <b>asRNAs differentially expressed during NaCl (0.5 M) treatment</b> |         |         |     |   |       |
| as6                                                                  | 182516  | 182617  | 102 | < | 0.12  |
| as12                                                                 | 291428  | 291543  | 116 | > | 0.16  |
| as19                                                                 | 448929  | 449284  | 356 | > | 0.20  |
| as48                                                                 | 1060351 | 1060676 | 326 | > | 0.27  |
| as55                                                                 | 1135776 | 1135875 | 100 | < | 0.33  |

|       |         |         |     |   |       |
|-------|---------|---------|-----|---|-------|
| as235 | 5863452 | 5863719 | 268 | > | 0.36  |
| as74  | 1558500 | 1558752 | 253 | < | 0.41  |
| as84  | 1911985 | 1912118 | 134 | > | 2.55  |
| as214 | 5545002 | 5545131 | 130 | > | 2.71  |
| as36  | 798624  | 798854  | 231 | > | 3.58  |
| as236 | 5868209 | 5868408 | 200 | > | 4.13  |
| as204 | 5301771 | 5301838 | 68  | > | 6.66  |
| as62  | 1455941 | 1456046 | 106 | > | 12.37 |

**asRNAs differentially expressed during PP (3xMIC) treatment**

---

|            |         |         |     |   |       |
|------------|---------|---------|-----|---|-------|
| as6        | 182516  | 182617  | 102 | < | 0.07  |
| as104      | 2445134 | 2445251 | 118 | > | 0.09  |
| as48       | 1060351 | 1060676 | 326 | > | 0.25  |
| as94       | 2027457 | 2027571 | 115 | < | 0.29  |
| as19       | 448929  | 449284  | 356 | > | 0.34  |
| as138      | 3530607 | 3530794 | 188 | > | 0.39  |
| as43       | 990194  | 990309  | 116 | < | 0.40  |
| as92       | 2012282 | 2012454 | 173 | > | 0.42  |
| as55       | 1135776 | 1135875 | 100 | < | 0.50  |
| as212      | 5532791 | 5532916 | 126 | < | 2.11  |
| as181      | 4773392 | 4773503 | 112 | > | 2.31  |
| as44       | 1026460 | 1026563 | 104 | > | 2.36  |
| as162      | 4156819 | 4156946 | 128 | < | 2.47  |
| as96       | 2113618 | 2113734 | 117 | < | 2.71  |
| as143      | 3542803 | 3542997 | 195 | > | 2.79  |
| asponA**** | 5680819 | 5681167 | 349 | < | 2.83  |
| as146      | 3612043 | 3612282 | 240 | > | 2.95  |
| as91       | 1954420 | 1954469 | 50  | < | 3.14  |
| as221      | 5618584 | 5618634 | 51  | > | 4.17  |
| as205      | 5356355 | 5356495 | 141 | < | 4.22  |
| as16       | 353325  | 353458  | 134 | > | 4.25  |
| as244      | 6157855 | 6157964 | 110 | < | 6.49  |
| as129      | 3120806 | 3120915 | 110 | < | 21.17 |

**asRNAs differentially expressed during TET (3xMIC) treatment**

---

|            |         |         |     |   |      |
|------------|---------|---------|-----|---|------|
| as92       | 2012282 | 2012454 | 173 | > | 0.02 |
| as78       | 1698424 | 1698534 | 111 | > | 0.04 |
| as19       | 448929  | 449284  | 356 | > | 0.05 |
| as165      | 4242856 | 4242966 | 111 | < | 0.07 |
| as21       | 544658  | 544778  | 121 | < | 0.08 |
| as12       | 291428  | 291543  | 116 | > | 0.10 |
| as6        | 182516  | 182617  | 102 | < | 0.13 |
| as26       | 659114  | 659270  | 157 | > | 0.14 |
| as217      | 5584935 | 5585163 | 229 | < | 0.15 |
| as94       | 2027457 | 2027571 | 115 | < | 0.16 |
| asponA**** | 5680819 | 5681167 | 349 | < | 0.18 |
| as31       | 748895  | 749047  | 153 | < | 0.20 |
| as120      | 2982707 | 2982848 | 142 | < | 0.24 |
| as42       | 977508  | 977658  | 151 | > | 0.25 |
| as157      | 4048252 | 4048377 | 126 | > | 0.26 |
| as53       | 1119615 | 1119886 | 272 | > | 0.26 |
| as29       | 701233  | 701489  | 257 | < | 0.28 |
| as9        | 263722  | 263909  | 188 | < | 0.31 |
| as23       | 557312  | 557569  | 258 | > | 0.33 |
| as192      | 5049739 | 5049879 | 141 | < | 0.36 |
| as250      | 6247796 | 6247909 | 114 | > | 0.40 |
| as144      | 3592018 | 3592128 | 111 | > | 0.43 |
| as206      | 5375454 | 5375529 | 76  | < | 0.47 |

|       |         |         |     |   |       |
|-------|---------|---------|-----|---|-------|
| as67  | 1499690 | 1499742 | 53  | < | 0.49  |
| as74  | 1558500 | 1558752 | 253 | < | 2.30  |
| as60  | 1394817 | 1395002 | 186 | > | 2.40  |
| as11  | 290529  | 290665  | 137 | > | 2.43  |
| as154 | 3944227 | 3944342 | 116 | < | 2.98  |
| as111 | 2756364 | 2756944 | 581 | < | 3.03  |
| as162 | 4156819 | 4156946 | 128 | < | 3.51  |
| as104 | 2445134 | 2445251 | 118 | > | 3.72  |
| as163 | 4166790 | 4167046 | 257 | < | 4.18  |
| as239 | 5926819 | 5926963 | 145 | > | 4.37  |
| as142 | 3540908 | 3541027 | 120 | > | 4.83  |
| as203 | 5296311 | 5296538 | 228 | < | 5.44  |
| as54  | 1135102 | 1135286 | 185 | < | 5.69  |
| as236 | 5868209 | 5868408 | 200 | > | 6.63  |
| as241 | 6090655 | 6090800 | 146 | > | 6.76  |
| as30  | 718785  | 718934  | 150 | > | 6.97  |
| as136 | 3508613 | 3508673 | 61  | < | 7.51  |
| as210 | 5473394 | 5473504 | 111 | > | 7.66  |
| as99  | 2121071 | 2121240 | 170 | > | 7.79  |
| as107 | 2623295 | 2623503 | 209 | < | 9.26  |
| as25  | 654775  | 654912  | 138 | > | 10.98 |
| as16  | 353325  | 353458  | 134 | > | 11.47 |
| as64  | 1484863 | 1485037 | 175 | < | 11.74 |
| as216 | 5580862 | 5581109 | 248 | < | 12.15 |
| as244 | 6157855 | 6157964 | 110 | < | 14.57 |
| as167 | 4327946 | 4328181 | 236 | > | 16.07 |
| as88  | 1949036 | 1949142 | 107 | > | 19.62 |
| as117 | 2946138 | 2946205 | 68  | < | 20.08 |
| as49  | 1066483 | 1066610 | 128 | > | 20.16 |
| as20  | 521726  | 521838  | 113 | > | 21.57 |
| as76  | 1639661 | 1639805 | 145 | > | 24.33 |
| as50  | 1073865 | 1074007 | 143 | < | 25.41 |
| as134 | 3395484 | 3395684 | 201 | > | 26.97 |
| as47  | 1056103 | 1056248 | 146 | < | 27.11 |
| as115 | 2902292 | 2902391 | 100 | < | 42.28 |
| as247 | 6183216 | 6183389 | 174 | < | 43.19 |

**asRNAs differentially expressed during TOB (3xMIC) treatment**

---

|            |         |         |     |   |      |
|------------|---------|---------|-----|---|------|
| as92       | 2012282 | 2012454 | 173 | > | 0.07 |
| as165      | 4242856 | 4242966 | 111 | < | 0.08 |
| as42       | 977508  | 977658  | 151 | > | 0.11 |
| as120      | 2982707 | 2982848 | 142 | < | 0.13 |
| as6        | 182516  | 182617  | 102 | < | 0.14 |
| as78       | 1698424 | 1698534 | 111 | > | 0.16 |
| as19       | 448929  | 449284  | 356 | > | 0.17 |
| asponA**** | 5680819 | 5681167 | 349 | < | 0.18 |
| as119      | 2959629 | 2959767 | 139 | < | 0.21 |
| as74       | 1558500 | 1558752 | 253 | < | 0.25 |
| as12       | 291428  | 291543  | 116 | > | 0.36 |
| as26       | 659114  | 659270  | 157 | > | 0.40 |
| as206      | 5375454 | 5375529 | 76  | < | 0.40 |
| as183      | 4781848 | 4781947 | 100 | < | 0.41 |
| as21       | 544658  | 544778  | 121 | < | 0.45 |
| as200      | 5148538 | 5148668 | 131 | > | 0.47 |
| as31       | 748895  | 749047  | 153 | < | 0.48 |
| as7        | 184720  | 184861  | 142 | < | 2.07 |
| as214      | 5545002 | 5545131 | 130 | > | 2.31 |

|       |         |         |     |   |        |
|-------|---------|---------|-----|---|--------|
| as77  | 1640773 | 1640948 | 176 | > | 2.36   |
| as195 | 5071575 | 5071963 | 389 | < | 2.40   |
| as250 | 6247796 | 6247909 | 114 | > | 2.43   |
| as39  | 921673  | 921840  | 168 | > | 2.46   |
| as38  | 898637  | 898918  | 282 | > | 2.53   |
| as146 | 3612043 | 3612282 | 240 | > | 2.55   |
| as168 | 4328357 | 4328518 | 162 | > | 2.67   |
| as203 | 5296311 | 5296538 | 228 | < | 2.79   |
| as179 | 4763739 | 4763790 | 52  | > | 2.94   |
| as176 | 4759525 | 4759686 | 162 | > | 3.38   |
| as233 | 5824524 | 5824599 | 76  | < | 3.67   |
| as107 | 2623295 | 2623503 | 209 | < | 3.75   |
| as182 | 4780416 | 4780494 | 79  | > | 3.80   |
| as247 | 6183216 | 6183389 | 174 | < | 3.82   |
| as97  | 2113817 | 2113927 | 111 | < | 3.94   |
| as115 | 2902292 | 2902391 | 100 | < | 4.15   |
| as52  | 1098349 | 1098557 | 209 | > | 4.22   |
| as45  | 1027896 | 1028083 | 188 | < | 4.34   |
| as27  | 680736  | 680853  | 118 | < | 4.41   |
| as50  | 1073865 | 1074007 | 143 | < | 4.57   |
| as76  | 1639661 | 1639805 | 145 | > | 4.60   |
| as95  | 2113335 | 2113442 | 108 | < | 5.62   |
| as25  | 654775  | 654912  | 138 | > | 6.19   |
| as138 | 3530607 | 3530794 | 188 | > | 6.37   |
| as64  | 1484863 | 1485037 | 175 | < | 6.41   |
| as99  | 2121071 | 2121240 | 170 | > | 7.55   |
| as110 | 2756154 | 2756267 | 114 | < | 7.72   |
| as62  | 1455941 | 1456046 | 106 | > | 7.76   |
| as30  | 718785  | 718934  | 150 | > | 8.27   |
| as236 | 5868209 | 5868408 | 200 | > | 9.24   |
| as96  | 2113618 | 2113734 | 117 | < | 11.00  |
| as205 | 5356355 | 5356495 | 141 | < | 11.76  |
| as93  | 2027111 | 2027193 | 83  | < | 14.45  |
| as162 | 4156819 | 4156946 | 128 | < | 14.83  |
| as16  | 353325  | 353458  | 134 | > | 18.51  |
| as71  | 1504553 | 1504676 | 124 | < | 20.05  |
| as245 | 6158032 | 6158203 | 172 | < | 20.79  |
| as70  | 1503843 | 1503937 | 95  | < | 30.29  |
| as244 | 6157855 | 6157964 | 110 | < | 37.70  |
| as136 | 3508613 | 3508673 | 61  | < | 41.81  |
| as20  | 521726  | 521838  | 113 | > | 51.70  |
| as36  | 798624  | 798854  | 231 | > | 104.80 |

**asRNAs differentially expressed during early stationary phase**

---

|       |         |         |     |   |      |
|-------|---------|---------|-----|---|------|
| as6   | 182516  | 182617  | 102 | < | 0.02 |
| as231 | 5799079 | 5799208 | 130 | > | 0.11 |
| as78  | 1698424 | 1698534 | 111 | > | 0.05 |
| as201 | 5274032 | 5274193 | 162 | > | 0.05 |
| as75  | 1588434 | 1588549 | 116 | < | 0.10 |
| as161 | 4110202 | 4110321 | 120 | > | 0.11 |
| as190 | 5018832 | 5019000 | 169 | > | 0.11 |
| as44  | 1026460 | 1026563 | 104 | > | 0.13 |
| as121 | 3005381 | 3005497 | 117 | < | 0.15 |
| as230 | 5785777 | 5785905 | 129 | < | 0.16 |
| as212 | 5532791 | 5532916 | 126 | < | 0.18 |
| as203 | 5296311 | 5296538 | 228 | < | 0.19 |
| as82  | 1790530 | 1790650 | 121 | > | 0.20 |

|            |         |         |     |   |       |
|------------|---------|---------|-----|---|-------|
| as48       | 1060351 | 1060676 | 326 | > | 0.22  |
| as26       | 659114  | 659270  | 157 | > | 0.24  |
| as19       | 448929  | 449284  | 356 | > | 0.26  |
| as7        | 184720  | 184861  | 142 | < | 0.27  |
| as104      | 2445134 | 2445251 | 118 | > | 0.30  |
| as43       | 990194  | 990309  | 116 | < | 0.31  |
| as165      | 4242856 | 4242966 | 111 | < | 0.32  |
| as216      | 5580862 | 5581109 | 248 | < | 0.32  |
| as210      | 5473394 | 5473504 | 111 | > | 0.32  |
| as23       | 557312  | 557569  | 258 | > | 0.32  |
| as74       | 1558500 | 1558752 | 253 | < | 0.35  |
| as81       | 1785747 | 1785881 | 135 | > | 0.36  |
| as21       | 544658  | 544778  | 121 | < | 0.36  |
| as42       | 977508  | 977658  | 151 | > | 0.37  |
| as138      | 3530607 | 3530794 | 188 | > | 0.44  |
| as235      | 5863452 | 5863719 | 268 | > | 0.47  |
| as144      | 3592018 | 3592128 | 111 | > | 0.48  |
| as55       | 1135776 | 1135875 | 100 | < | 0.49  |
| as94       | 2027457 | 2027571 | 115 | < | 0.49  |
| as9        | 263722  | 263909  | 188 | < | 0.56  |
| as53       | 1119615 | 1119886 | 272 | > | 0.57  |
| as92       | 2012282 | 2012454 | 173 | > | 0.70  |
| as31       | 748895  | 749047  | 153 | < | 0.90  |
| as60       | 1394817 | 1395002 | 186 | > | 1.51  |
| as29       | 701233  | 701489  | 257 | < | 1.70  |
| as67       | 1499690 | 1499742 | 53  | < | 1.83  |
| as214      | 5545002 | 5545131 | 130 | > | 1.89  |
| as142      | 3540908 | 3541027 | 120 | > | 2.00  |
| as143      | 3542803 | 3542997 | 195 | > | 2.09  |
| as200      | 5148538 | 5148668 | 131 | > | 2.39  |
| as111      | 2756364 | 2756944 | 581 | < | 2.77  |
| as38       | 898637  | 898918  | 282 | > | 2.91  |
| as84       | 1911985 | 1912118 | 134 | > | 3.18  |
| as68       | 1502841 | 1502987 | 147 | < | 3.27  |
| as204      | 5301771 | 5301838 | 68  | > | 3.64  |
| as110      | 2756154 | 2756267 | 114 | < | 3.67  |
| as228      | 5725557 | 5725795 | 239 | > | 3.91  |
| as168      | 4328357 | 4328518 | 162 | > | 3.91  |
| as157      | 4048252 | 4048377 | 126 | > | 4.10  |
| as101      | 2314771 | 2314932 | 162 | < | 4.12  |
| as194      | 5055132 | 5055185 | 54  | > | 4.31  |
| as158      | 4070600 | 4070735 | 136 | > | 4.60  |
| as169      | 4329401 | 4329645 | 245 | > | 5.21  |
| as197      | 5101107 | 5101200 | 94  | < | 5.35  |
| as249      | 6245830 | 6245973 | 144 | > | 7.19  |
| as99       | 2121071 | 2121240 | 170 | > | 7.48  |
| as135      | 3414435 | 3414491 | 57  | < | 7.76  |
| as173      | 4619821 | 4619903 | 83  | < | 7.97  |
| asdnaA**** | 1656    | 1813    | 158 | < | 8.70  |
| as62       | 1455941 | 1456046 | 106 | > | 9.45  |
| as238      | 5897008 | 5897057 | 50  | > | 11.15 |
| as239      | 5926819 | 5926963 | 145 | > | 11.43 |
| as195      | 5071575 | 5071963 | 389 | < | 12.18 |
| as218      | 5585580 | 5585652 | 73  | > | 12.18 |
| as148      | 3626660 | 3626776 | 117 | < | 12.90 |
| as147      | 3625886 | 3625995 | 110 | < | 14.45 |



|       |         |         |     |   |       |
|-------|---------|---------|-----|---|-------|
| as221 | 5618584 | 5618634 | 51  | > | 14.92 |
| as11  | 290529  | 290665  | 137 | > | 15.87 |
| as182 | 4780416 | 4780494 | 79  | > | 16.64 |
| as176 | 4759525 | 4759686 | 162 | > | 17.15 |
| as34  | 784213  | 784303  | 91  | < | 18.57 |
| as8   | 226915  | 226976  | 62  | < | 18.59 |
| as151 | 3752069 | 3752155 | 87  | > | 20.20 |
| as105 | 2550592 | 2550780 | 189 | < | 20.43 |
| as196 | 5071970 | 5072154 | 185 | < | 21.03 |
| as141 | 3540497 | 3540593 | 97  | > | 21.54 |
| as232 | 5817430 | 5817493 | 64  | < | 22.70 |
| as133 | 3357890 | 3357996 | 107 | > | 23.80 |
| as186 | 4925623 | 4925733 | 111 | > | 23.83 |
| as114 | 2818927 | 2819159 | 233 | > | 24.56 |
| as149 | 3631510 | 3631629 | 120 | < | 25.52 |
| as89  | 1953270 | 1953371 | 102 | < | 28.32 |
| as87  | 1916046 | 1916172 | 127 | < | 28.79 |
| as178 | 4761521 | 4761592 | 72  | > | 29.29 |
| as223 | 5678557 | 5678652 | 96  | > | 30.13 |
| as199 | 5141781 | 5141969 | 189 | > | 34.59 |
| as237 | 5896925 | 5897003 | 79  | > | 39.97 |
| as145 | 3593054 | 3593188 | 135 | < | 42.93 |
| as242 | 6135711 | 6135789 | 79  | < | 45.32 |
| as13  | 299094  | 299181  | 88  | > | 57.43 |
| as56  | 1141250 | 1141364 | 115 | < | 66.44 |
| as137 | 3517655 | 3517722 | 68  | > | 67.12 |
| as229 | 5739066 | 5739203 | 138 | > | 72.49 |
| as108 | 2701170 | 2701296 | 127 | < | 61.53 |
| as122 | 3013744 | 3013890 | 147 | > | 55.57 |
| as28  | 697609  | 697703  | 95  | < | 77.29 |
| as164 | 4185534 | 4185601 | 68  | < | 70.65 |
| as189 | 5002347 | 5002404 | 58  | < | 71.99 |
| as226 | 5699012 | 5699062 | 51  | < | 77.00 |
| as59  | 1323807 | 1323918 | 112 | > | 70.06 |
| as159 | 4087208 | 4087269 | 62  | > | 73.52 |
| as222 | 5655041 | 5655112 | 72  | < | 79.82 |
| as172 | 4616918 | 4616968 | 51  | < | 92.70 |

\* Coordinates and length of the sRNAs predicted by RNA-Seq data.

\*\* The fold change is calculated as the ratio of the intensities between the treated condition and the untreated control. Thus a fold change > 1 indicates that the sRNA is significantly more expressed in the treated condition.

\*\*\*\*Coordinates validated by 5' and 3'-RACE experiments.
