# Supplementary material for: Expression of antisense small RNAs in response to stress in Pseudomonas aeruginosa
Source: PubMed Central journal article supplement (PMC4180829; doi:10.1186/1471-2164-15-783), 2014-09-11

**Additional file 5. AsponA in *P. aeruginosa* PAO1.** AsponA is encoded opposite the beginning of gene *ponA*, encoding the penicillin-binding protein 1A, and overlaps with the predicted -10 and -35  $\sigma^{70}$  promoter elements. Its coordinates have been validated by 5'- and 3'-RACE. Genes are depicted in blue and asRNAs in green.

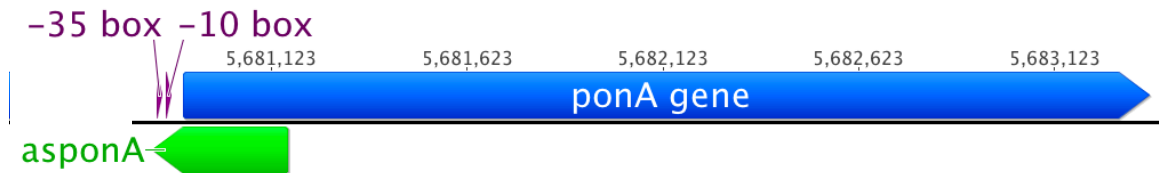

Supplement: 12864_2014_6485_MOESM5_ESM.pdf [file 12864_2014_6485_MOESM5_ESM.pdf]
