# Supplementary material for: Expression of antisense small RNAs in response to stress in Pseudomonas aeruginosa
Source: Springer Nature journal article supplement (doi:10.1186/1471-2164-15-783), 2014-09-11
Supplement: 12864_2014_6485_MOESM6_ESM.pdf [file 12864_2014_6485_MOESM6_ESM.pdf]

## Additional file 6. Primers and adapters used in the study.

| Primer                         | Sequence (5'→3')                              | Use                                                         |
|--------------------------------|-----------------------------------------------|-------------------------------------------------------------|
| 23S-1954                       | AAAAAAAAAAAAAAAAAACTTACCCGACAAGGAATTCGC       | Removal of 23S rRNA (provided in MICROBExpress kit, Ambion) |
| 23S-2511                       | AAAAAAAAAAAAAAAAAGAGCCGACATCGAGGTGCCAAC       | Removal of 23S rRNA (provided in MICROBExpress kit, Ambion) |
| 16S-807                        | AAAAAAAAAAAAAAAAATGGACTACCAGGTATCTAATCC       | Removal of 16S rRNA (provided in MICROBExpress kit, Ambion) |
| 16S-1114                       | AAAAAAAAAAAAAAAAAGGGTTGCGCTCGTTACGGGACTT      | Removal of 16S rRNA (provided in MICROBExpress kit, Ambion) |
| 5S                             | AAAAAAAAAAAAAAAAAGCGTTTCACTTCTGAGTTCGGCA      | Removal of 5S rRNA                                          |
| 5' RNA adapter                 | GCUGAUGGCGAUGAAUGAACACUGCGUUUGCUGGCUUUGAUGAAA | 5'-RACE                                                     |
| 5' RNA adapter-specific primer | GCTGATGGCGATGAATGAACACTG                      | 5'-RACE                                                     |
| 5'-GSP1_ <i>asponA</i>         | AGATGCGCCGGACGCCGATC                          | 5'-RACE <i>asponA</i>                                       |
| 5'-GSP2_ <i>asponA</i>         | CTTCGCCGACATCCCGCAGGA                         | 5'-RACE <i>asponA</i>                                       |
| 3' RNA adapter E1              | UUCACUGUUCUUAGCGGCCGCAUGCUC-idT               | 3'-RACE                                                     |
| 3' RNA adapter E1 primer       | CATGCGGCCGCTAAGAACAGTGA                       | 3'-RACE                                                     |
| 3'-GSP1_ <i>asponA</i>         | GAAATTGTCGTCCTCGGCGGACA                       | 3'-RACE <i>asponA</i>                                       |
| 3'-GSP2_ <i>asponA</i>         | CAGGGCATGGATGAAGTCCTG                         | 3'-RACE <i>asponA</i>                                       |
