# Supplementary figures and images for: Expression of antisense small RNAs in response to stress in Pseudomonas aeruginosa
Source: Springer Nature journal article supplement (doi:10.1186/1471-2164-15-783), 2014-09-11

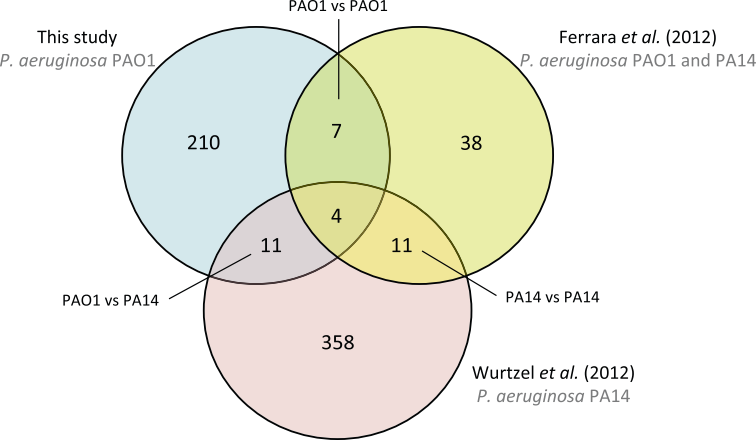

Supplement: 12864_2014_6485_MOESM10_ESM.pdf [file 12864_2014_6485_MOESM10_ESM.pdf]

A

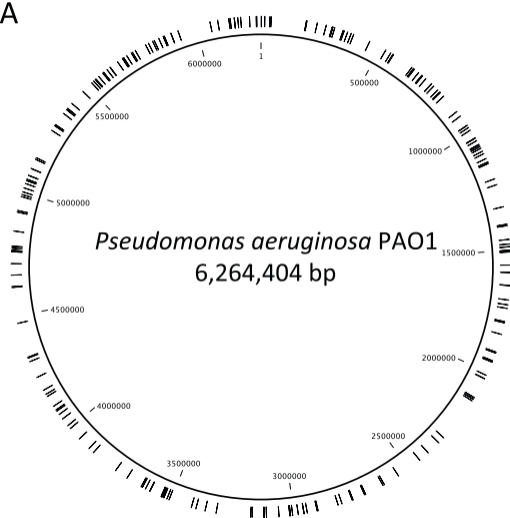

B

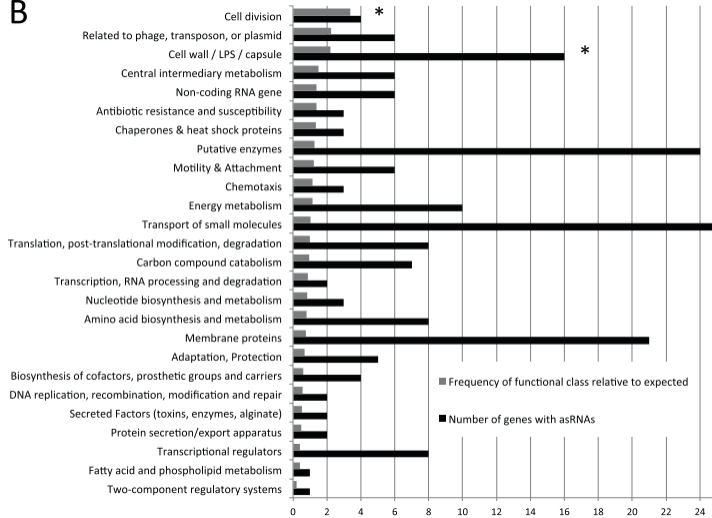

Supplement: 12864_2014_6485_MOESM8_ESM.pdf [file 12864_2014_6485_MOESM8_ESM.pdf]

A

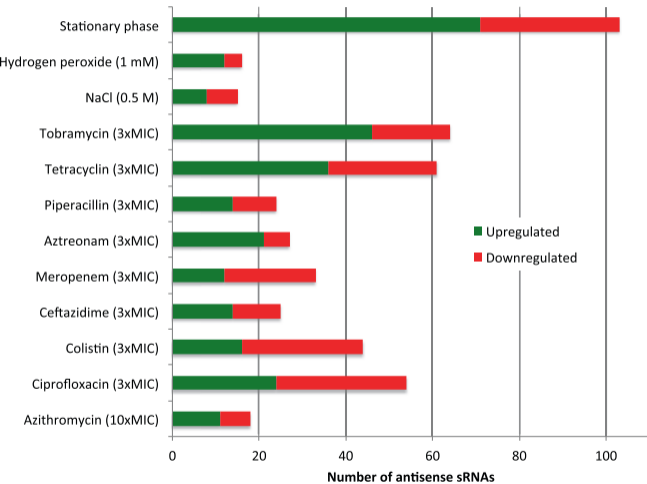

B

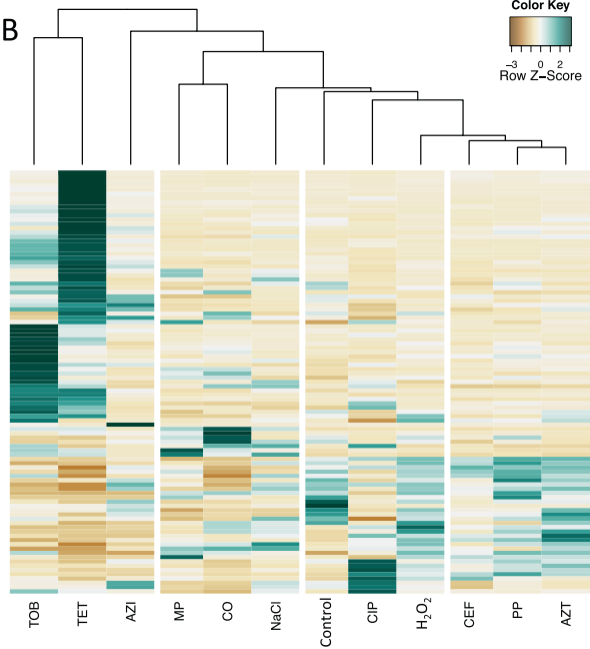

Supplement: 12864_2014_6485_MOESM9_ESM.pdf [file 12864_2014_6485_MOESM9_ESM.pdf]
